# Supplementary material for: Targeted Noninvasive Imaging of EGFR-Expressing Orthotopic Pancreatic Cancer Using Multispectral Optoacoustic Tomography
Source: Oxford University Press journal article supplement (doi:10.1158/0008-5472.can-14-1656), 2014-09-13
Supplement: 00085472can141656-sup-132704_1_supp_0_nncvdn.docx [file 00085472can141656-sup-132704_1_supp_0_nncvdn.docx]

**Supplemental Figure 1.** Quantification of EGF-750 probe MSOT signal accumulation within S2VP10L tumor xenografts at various time points; maximal accumulation observed at 6 h post injection of probe.
